# 1 Local patterns of spread of influenza A(H3N2) virus in coastal Kenya over a one-year 2 period revealed through virus sequence data

3 D. Collins Owuor<sup>1#</sup>, Joyce M. Ngoi<sup>1</sup>, Festus M. Nyasimi<sup>1</sup>, Nickson Murunga<sup>1</sup>, Joyce U. Nyiro<sup>1</sup>,  
4 Rebecca Garten<sup>2</sup>, John R. Barnes<sup>2</sup>, Sandra S. Chaves<sup>2,3</sup>, D. James Nokes<sup>1,4</sup>, and Charles N.  
5 Agoti<sup>1,5</sup>

## 7 Affiliations

- 8 1. *Epidemiology and Demography Department, Kenya Medical Research Institute (KEMRI) -*  
9 *Wellcome Trust Research Programme, Kilifi, Kenya.*
- 10 2. *Influenza Division, National Center for Immunization and Respiratory Diseases (NCIRD),*  
11 *CDC, Atlanta, Georgia, USA.*
- 12 3. *Influenza Division, Centres for Disease Control and Prevention (CDC), Nairobi, Kenya.*
- 13 4. *School of Life Sciences and Zeeman Institute for Systems Biology and Infectious Disease*  
14 *Epidemiology Research (SBIDER), University of Warwick, Coventry, United Kingdom.*
- 15 5. *School of Public Health and Human Sciences, Pwani University, Kilifi, Kenya.*

## 17 #Corresponding author

18 Dr. D. Collins Owuor ([collinsdowuor@gmail.com](mailto:collinsdowuor@gmail.com)).

## 21 ABSTRACT

22 **Background:** The patterns of spread of influenza A viruses in local populations in tropical and  
23 sub-tropical regions are unclear due to sparsity of representative spatiotemporal sequence data.

24  
25 **Methods:** We sequenced and analyzed 58 influenza A(H3N2) virus genomes sampled between  
26 December 2015 and December 2016 from nine health facilities within the Kilifi Health and  
27 Demographic Surveillance System (KHDSS), a predominantly rural region, covering  
28 approximately 891 km<sup>2</sup> along the Kenyan coastline. The genomes were compared with 1,571  
29 contemporaneous global sequences from 75 countries.

30 **NOTE:** This preprint reports new research that has not been certified by peer review and should not be used to guide clinical practice.

31 **Results:** We observed at least five independent introductions of A(H3N2) viruses into the  
32 region during the one-year period, with the importations originating from Africa, Europe, and  
33 North America. We also inferred 23 virus location transition events between the nine facilities  
34 included in the study. International virus imports into the study area were captured at the  
35 facilities of Chasimba, Matsangoni, Mtondia, and Mavueni, while all four exports from the  
36 region were captured from the Chasimba facility, all occurring to Africa destinations. A strong  
37 spatial clustering of virus strains at all locations was observed associated with local evolution.

38

39 **Conclusion:** Our study shows that influenza A(H3N2) virus epidemics in local populations  
40 appear to be characterized by limited introductions followed by significant local spread and  
41 evolution.

42

43 **KEYWORDS:** Next generation sequencing, genomic surveillance, transmission, influenza,  
44 Kenya.

## 45 INTRODUCTION

46 Two subtypes of human influenza type A virus (IAV), A(H3N2) and A(H1N1)pdm09, and two  
47 lineages of human influenza type B virus (IBV), Victoria and Yamagata, currently co-circulate  
48 in human populations [1] causing annual seasonal epidemics globally [2-6]. These viruses  
49 belong to the family *Orthomyxoviridae*, which are enveloped, negative-sense, single-stranded  
50 RNA viruses with segmented genomes [7]. IAVs evolve rapidly and undergo immune driven  
51 selection through accumulation of amino acid changes, especially at antigenic sites of  
52 hemagglutinin (HA) glycoproteins [8-10]. These amino acid sequence drifts on HA are  
53 observed more frequently in A(H3N2) virus than A(H1N1)pdm09 virus [11, 12]. Since 2009,  
54 antigenic drift of A(H3N2) viruses has resulted in emergence of several genetic groups (i.e.,  
55 clades, subclades, and subgroups) globally, for example, clade 1 to 7 viruses [13]. Clade 3  
56 viruses are the most genetically diverse and are divided into several genetic groups: subclades  
57 3A, 3B, and 3C; and subgroups 3C.1, 3C.2, 3C.2a, 3C.3, and 3C.3a. We recently characterized  
58 A(H3N2) viruses that circulated in coastal Kenya between 2009 and 2017 and revealed co-  
59 circulation of multiple A(H3N2) virus genetic groups among hospitalized patients and  
60 outpatients [5].

61  
62 While the global spread of seasonal influenza viruses has been studied intensively using  
63 phylogenetic and phylogeographic approaches [14-20], their local patterns of spread remain  
64 less clear [21], especially at city-wide or town scale. Although it is important to understand  
65 how diseases spread around the globe, local spread is most often the main driver of novel cases  
66 of respiratory diseases such as COVID-19 or influenza [21]. Transmission patterns have been  
67 recorded at different levels of human social clustering. Household studies have been performed  
68 to investigate person-to-person influenza transmission [22]. Studies of college campuses using  
69 phylogenetic methods have revealed extensive mixing of influenza virus strains among college  
70 students [23]. City-wide and countrywide, transmission of influenza in a season is  
71 characterized by majorly multiple virus introductions into cities [21] and countries [24-26];  
72 viruses then spread from multiple geographical locations to multiple geographical destinations  
73 following introduction [24-26]. However, there is a paucity of studies that describe the patterns  
74 of spread of influenza on a local scale (city or town) due to sparsity of representative  
75 spatiotemporal sequence data from defined sub-populations residing in the same geography  
76 within a country [21, 27].

77

78 Given this gap in knowledge, we studied the patterns of spread of A(H3N2) virus in coastal  
79 Kenya using virus next generation sequencing (NGS) data collected over a one-year period  
80 between December 2015 and December 2016, along with 1,571 global A(H3N2) virus  
81 sequence data from 75 countries to provide a phylogenetic context.

82

## 83 **MATERIALS AND METHODS**

### 84 ***Study design***

85 The samples analysed in this study were collected from nine health facilities within the Kilifi  
86 Health and Demographic Surveillance System (KHDSS) [28, 29]. The KHDSS, in Kilifi  
87 County, is a predominantly rural location along the Kenyan coastline covering an area of 891  
88 km<sup>2</sup>; **Figure 1, Panel A**. The KHDSS monitors a population of approximately 296,000  
89 residents (2016 census) through household enumeration visits conducted every 4 months [29].  
90 The KHDSS area has 21 public health facilities (including Kilifi County Hospital (KCH)) that  
91 receives outpatients and operates under the Kenya Ministry of Health. In total, nine of these  
92 facilities, spread throughout the KHDSS, were selected for this study: Matsangoni, Ngerenya,  
93 Mtondia, Sokoke, Mavueni, Jaribuni, Chasimba, Pingilikani, and Junju, **Figure 1, Panel A**.  
94 Non-residents and residents of the KHDSS presenting to these facilities were included. A total  
95 of 5,796 nasopharyngeal (NP) swab samples were taken from outpatients across all age groups  
96 presenting with acute respiratory illness (ARI). A comprehensive description of the study area  
97 and ARI surveillance at the KHDSS outpatient health facilities has been provided in our  
98 previous publications [28, 29].

99

### 100 ***Sample handling and molecular screening***

101 NP samples were stored in viral transport medium (VTM) at  $-80^{\circ}\text{C}$  prior to molecular  
102 screening and subsequent laboratory processing [29, 30]. Samples were screened for a range  
103 of respiratory viruses, including IAV, using a multiplex (MPX) reverse transcription (RT)-PCR  
104 assay employing Qiagen QuantiFast multiplex RT-PCR kit (Qiagen); a real-time PCR cycle  
105 threshold (Ct) of  $<35.0$  was used to define virus-positive samples [30]. A total of 97 IAV  
106 positive specimens were available for genome sequencing from the KHDSS facilities.

107

### 108 ***RNA extraction and multi-segment real-time PCR (M-RT-PCR)***

109 Viral nucleic acid extraction from IAV positive samples was performed using QIAamp Viral  
110 RNA Mini Kit (Qiagen). Extracted RNA was reverse transcribed, and the entire IAV genome  
111 amplified in a single M-RT-PCR reaction using the Uni/Inf primer set [31]. Successful  
112 amplification was evaluated by running the products on a 2% agarose gel and visualized on a  
113 UV transilluminator after staining with RedSafe Nucleic Acid Staining solution (iNtRON  
114 Biotechnology Inc.,).

115

### 116 *IAV next generation sequencing and genome assembly*

117 Following M-RT-PCR, amplicon purification and library preparation was conducted as  
118 previously described [5]. Libraries were then diluted to 2 nmol/L, pooled, denatured, diluted  
119 to 12.5 pmol/L and sequenced on the Illumina MiSeq using 2 × 250 bp paired-end reads using  
120 the MiSeq v2 500 cycle kit with 5% Phi-X (Illumina) spike-in. Sequence assembly was  
121 performed using the Iterative Refinement Meta-Assembler (IRMA) [32] in EDGE  
122 Bioinformatics environment [33] using IRMA default settings: median read Q-score filter of  
123 30; minimum read length of 125; frequency threshold for insertion and deletion refinement of  
124 0.25 and 0.6, respectively; Smith-Waterman mismatch penalty of 5; and gap opening penalty  
125 of 10. All generated sequence data were deposited in the Global Initiative on Sharing All  
126 Influenza Data (GISAID) EpiFlu™ database (<https://platform.gisaid.org/epi3/cfrontend>) under  
127 the accession numbers EPI\_ISL\_393682, EPI\_ISL\_393684-393703, EPI\_ISL\_393705-  
128 393709, EPI\_ISL\_393711-393723, EPI\_ISL\_393725-393753, EPI\_ISL\_393936-393946,  
129 EPI\_ISL\_393949, EPI\_ISL\_393951-393953, EPI\_ISL\_393955-393956, EPI\_ISL\_393960,  
130 EPI\_ISL\_393963, EPI\_ISL\_393965-393969, EPI\_ISL\_394051-394052, EPI\_ISL\_394107-  
131 394112.

132

### 133 *Collation of contemporaneous global sequence dataset*

134 Global comparison datasets for A(H3N2) virus were retrieved from the GISAID EpiFlu™  
135 database (<https://platform.gisaid.org/epi3/cfrontend>). The datasets were prepared to determine  
136 the relatedness of the viruses in this study to those circulating around the world thus understand  
137 their global context. Data processing included removal of duplicate sequences, sequences with  
138 missing dates (collection date and month), incomplete sequences, and sequences with  
139 ambiguous nucleotides (N). The data were organized into a Microsoft Excel database which  
140 also stored the associated metadata (country of origin, date of isolation, subtype, and sequence

141 length per segment). In-house python scripts were used in the extraction and manipulation of  
142 the data. Additionally, sequences were binned by calendar year for temporal analysis. A final  
143 dataset of 1,571 global sequences sampled between January 2014 and December 2016 was  
144 available (numbers in parenthesis indicate number of sequences): Africa (281); Asia (250);  
145 Europe (250); North America (250); South America (290); and Oceania (250). The accession  
146 numbers for the global genomes are available in the study's GitHub repository,  
147 ([https://github.com/DCollinsOwuor/H3N2\\_Kilifi\\_Kenya\\_molecular\\_epidemiology\\_2015-](https://github.com/DCollinsOwuor/H3N2_Kilifi_Kenya_molecular_epidemiology_2015-16)  
148 [16](https://github.com/DCollinsOwuor/H3N2_Kilifi_Kenya_molecular_epidemiology_2015-16)).

149

### 150 *Phylogenetic analysis*

151 Consensus nucleotide sequences were aligned using MUSCLE program  
152 (<https://www.ebi.ac.uk/Tools/msa/muscle/>) and translated in AliView v1.26 [34]. The  
153 individual genome segments were concatenated into codon-complete genomes using  
154 SequenceMatrix v1.8 [35]. The full-length hemagglutinin (HA) sequences of all viruses were  
155 used to characterize A(H3N2) virus strains into genetic groups using Phylogenetic Clustering  
156 using Linear Integer Programming (PhyCLIP) [36] and the European CDC Guidelines [13].  
157 Maximum-likelihood (ML) phylogenetic trees of A(H3N2) virus sequences from Kilifi and  
158 global contemporaneous sequences were reconstructed using IQTREE v2.0.7. The software  
159 initiates tree reconstruction after assessment and selection of the best model of nucleotide  
160 substitution for alignment. The ML trees were linked to various metadata in R programming  
161 software v4.0.2 and visualized using R ggtree v2.4.2 [37]. TempEst v1.5.3 was used to assess  
162 the presence of a molecular clock signal in the analyzed data, and linear regression of root-to-  
163 tip genetic distances against sampling dates were reconstructed.

164

### 165 *Reassortment analysis*

166 The concatenated codon-complete genomes, based on sequences of all the eight individual  
167 gene segments of A(H3N2) viruses from Kilifi, were used to reconstruct a full-length  
168 phylogenetic tree, which was annotated by genetic group using ggtree v2.4.2 [37].  
169 Reassortment events were assessed computationally using the Graph-incompatibility-based  
170 Reassortment Finder (GiRaF) tool [38]. The concatenated genome tree was used to infer the  
171 clustering patterns of each gene segment, show lineage classification of all eight individual  
172 gene segments, and detect reassortment events.

173

#### 174 *Estimating A(H3N2) virus imports and exports*

175 The ML tree topology based on Kilifi and global sequences was used to estimate the number  
176 of viral transmission events between Kilifi and the rest of the world. TreeTime [39] was used  
177 to transform the ML tree topology into a dated tree. Outlier sequences were identified by  
178 TreeTime and excluded during the process. A migration model was henceforth fitted to the  
179 resulting time-scaled phylogenetic tree from TreeTime, mapping the location status of the  
180 genomes from the nine health facilities at both the tip and internal nodes. Using the date and  
181 location annotated tree topology, the number of transitions between and within Kilifi and the  
182 rest of the world were counted and plotted using ggplot2 v3.3.3.

183

#### 184 *Bayesian Tip-association Significance (BaTS) test*

185 The strength of geographical clustering among the Kilifi viruses was assessed using the  
186 phylogeny-trait association test implemented in the BaTS package [40]. Each virus genome  
187 sequence was assigned a geographic code reflecting its place of sampling within the KHDSS.  
188 The overall statistical significance of geographical clustering of all Kilifi sequences was  
189 determined by calculating observed and expected association index and parsimony score  
190 statistics, where the null hypothesis is that clustering by geographical location is not more than  
191 that expected by chance. Additionally, the maximum clade statistic was used to compare the  
192 strength of clustering at each of the KHDSS location by calculating the expected and observed  
193 mean clade size from each of the nine outpatient locations. A significance level of  $p \leq 0.05$  was  
194 used in all scenarios.

195

#### 196 *Ethics*

197 Ethical clearance for the study was granted by the KEMRI - Scientific and Ethical Review Unit  
198 (SERU# 3103) and the University of Warwick Biomedical and Scientific Research Ethics  
199 Committee (BSREC# REGO-2015-6102). Informed consent was sought and received from the  
200 study participants for the study.

201

## 202 **RESULTS**

### 203 *IAV genome sequencing and assembly*

204 Among the 97 IAV positive specimens that were available from the KHDSS, 72 (74.2%) that  
 205 passed pre-sequencing quality control checks were loaded onto the Illumina MiSeq. A total of  
 206 63 (87.5%) codon-complete genomes were successfully assembled following sequencing: 58  
 207 (92.1%) A(H3N2) virus and 5 (7.9%) A(H1N1)pdm09 virus sequences, respectively; only the  
 208 58 A(H3N2) virus genomes were included in the analysis. The 58 genomes comprised 4 genetic  
 209 groups: clade 3C.2A (n=34, 58.6%), subclade 3C.2A2 (n=3, 5.2%), subclade 3C.2A3 (n=1,  
 210 1.7%), and subgroup 3C.2A1b (n=20, 34.5%). The socio-demographic characteristics of the  
 211 patients whose samples were analyzed in this report are shown in **Table 1**.

212

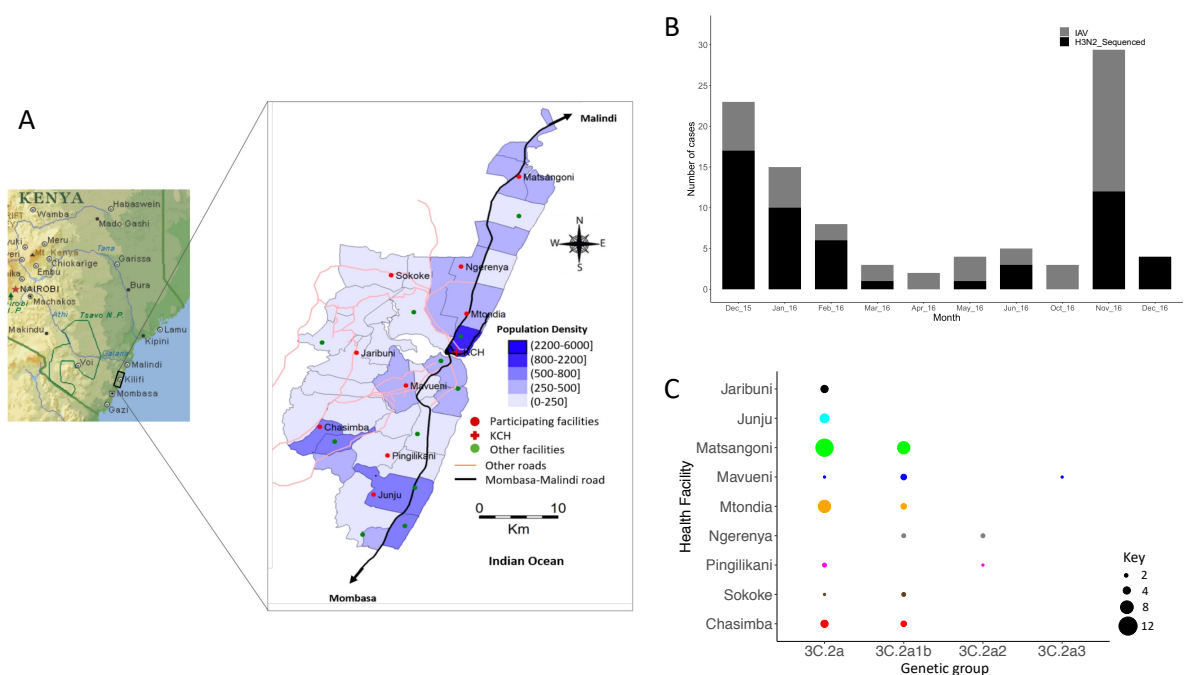

213

214 **Figure 1. Study locations, A(H3N2) virus detections in the enrolled health facilities, and**  
 215 **distribution of detected A(H3N2) virus genetic groups by health facility in Kilifi, Kenya. A**  
 216 **Map of the KHDSS area in Kilifi, coastal Kenya showing the spatial distribution of the enrolled KHDSS**  
 217 **health facilities (from [29]; adapted courtesy of Creative Commons Attribution Licensing). B**  
 218 **Bar plot showing number of IAV virus positive samples and sequenced A(H3N2) virus positive samples by**  
 219 **month in Kilifi between December 2015 and December 2016. All collected IAV positive samples and**  
 220 **sequenced A(H3N2) virus samples are indicated by color (all positive IAV samples in gray – IAV;**  
 221 **sequenced samples in black – H3N2\_Sequenced) as shown in the color key. C**  
 222 **Bubble plot showing A(H3N2) virus genetic groups distributed by KHDSS health facility. The size of the circle is**  
 223 **proportional to number of samples as shown in the counts key below the figure. KHDSS, Kilifi Health**  
 224 **and Demographic Surveillance System; IAV, influenza A virus.**

225



226 **Table 1.** Socio-demographic characteristics of the Kilifi Health and Demographic Surveillance  
227 System (KHDSS) outpatients.

228

|                       |                | Outpatient (KHDSS) |         |
|-----------------------|----------------|--------------------|---------|
|                       |                | n                  | %       |
| Age                   | 0-11 mths      | 9                  | (15.52) |
|                       | 12-59 mths     | 18                 | (31.04) |
|                       | 6-15 yrs       | 15                 | (25.86) |
|                       | 16-64 yrs      | 13                 | (22.41) |
|                       | >=65 yrs       | 3                  | (5.17)  |
| Sex                   | Female         | 26                 | (44.83) |
|                       | Male           | 32                 | (55.17) |
| Cough                 | No             | 2                  | (3.45)  |
|                       | Yes            | 56                 | (96.55) |
| Difficulty breathing  | No             | 53                 | (91.38) |
|                       | Yes            | 5                  | (8.62)  |
| Chest-wall in-drawing | No             | 53                 | (91.38) |
|                       | Yes            | 5                  | (8.62)  |
| Unable to feed        | No             | 56                 | (96.55) |
|                       | Yes            | 2                  | (3.45)  |
| Oxygen saturation     | <90            | 2                  | (3.45)  |
|                       | >=90           | 56                 | (96.55) |
| Conscious level       | Alert / Normal | 56                 | (96.55) |
|                       | Lethargic      | 2                  | (3.45)  |
|                       | Prostrate      | —                  | —       |
|                       | Unconscious    | —                  | —       |

229

230

### 231 *Spatiotemporal representativeness of sequenced samples*

232 IAV was detected throughout the surveillance period in coastal Kenya (except in July, August,  
233 and September 2016) with the number of observed cases fluctuating from month-to-month  
234 (**Figure 1, Panel B**). The proportion of samples from each health facility that were sequenced  
235 roughly reflected the overall distribution of positives that were detected in the specific health  
236 facilities (**Figure 1, Panel B**). Clade 3C.2A and subgroup 3C.2A1b viruses were detected in  
237 most of the facilities (8 and 6 of the 9 health facilities, respectively), which suggests that  
238 A(H3N2) viruses were in circulation in most locations in Kilifi without geographical restriction  
239 to a particular lineage during 2015-16, (**Figure 1, Panel C**). Subclade 3C.2A2 and subclade  
240 3C.2A3 viruses were characterized by three and one virus detection, respectively consistent  
241 with limited spread.

242

### 243 *Reassortment analysis*

244 The concatenated codon-complete phylogenetic tree of Kilifi viruses revealed a topology in  
245 which the detected A(H3N2) virus genetic groups had consistent lineage classification for each  
246 of the eight gene segments, which occurs in the absence of reassortment, **Figure 2**. These  
247 findings were verified computationally using the GiRaF reassortment analysis tool, which  
248 showed no evidence of reassortment in any of the A(H3N2) viruses. The full-length codon-  
249 complete sequences, which provide a greater phylogenetic resolution, were therefore analyzed  
250 to understand the patterns of spread of A(H3N2) virus in Kilifi.

251

### 252 *A(H3N2) virus diversity in Kilifi and viral imports and exports*

253 We first assessed how the 58 A(H3N2) virus genomes from Kilifi compared to 1,571 genomes  
254 sampled from around the world by inferring their phylogenies. The Kilifi genomes span the  
255 existing global diversity (**Figure 3**), which suggests exchange (most likely introductions into  
256 Kilifi) of viruses with other areas around the globe. We then used ancestral location state  
257 reconstruction of the dated phylogeny (**Figure 3**) to infer the number of viral imports and  
258 exports. We inferred five importations originating from outside the region (two from Europe,  
259 two from Africa, and one from North America), which represent five independent introductions  
260 into Kilifi from areas outside the region (**Figure 4**). We also inferred a total of 23 virus location  
261 transition events between the nine health facilities, **Figure 4**. International virus imports into  
262 the study area were captured at the facilities of Chasimba (n=13, 56.5%), Matsangoni (n=6,

263 26.1%), Mtondia (n=2, 8.7%), and Mavueni (n=2, 8.7%), while all four virus exports from the  
264 region were captured from Chasimba facility, all occurring to Africa destinations (**Figure 4**).

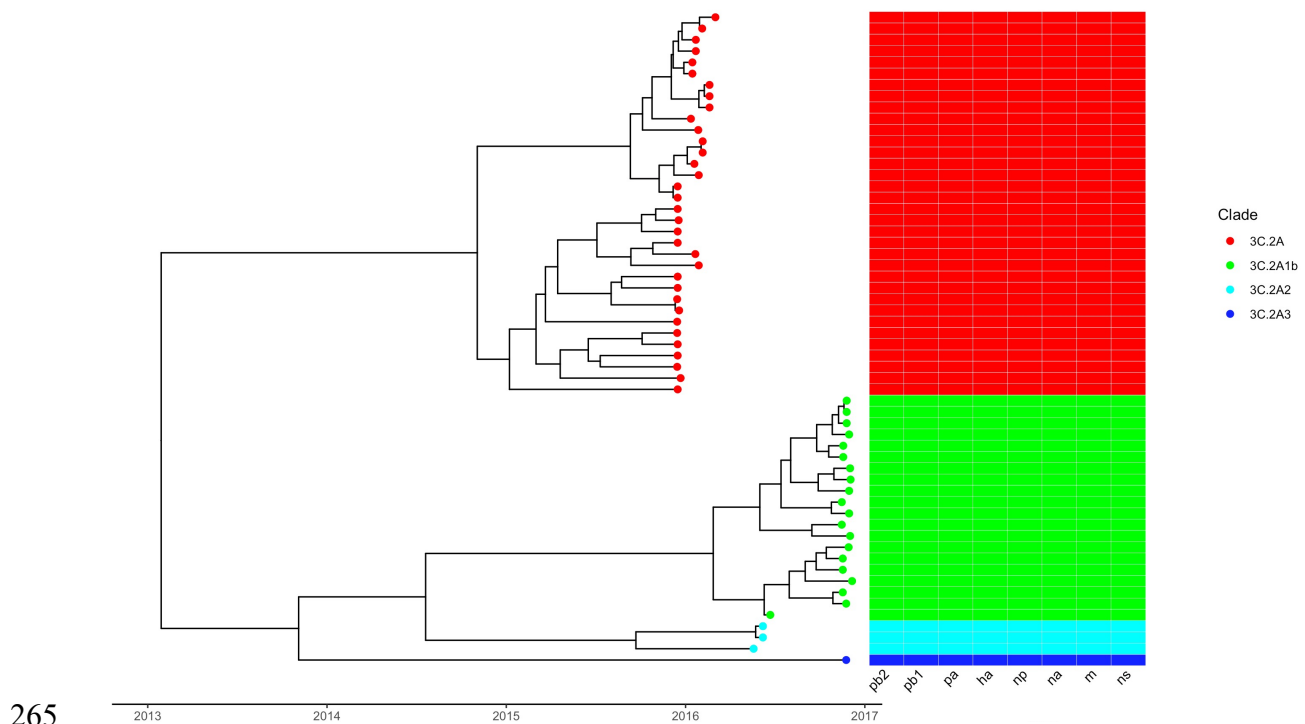

265

266 **Figure 2. Phylogenetic tree of concatenated segments of A(H3N2) viruses from Kilifi, Kenya and**  
267 **schematic showing individual gene segment lineages.** The time-resolved tree was constructed using  
268 58 genome-complete sequences of A(H3N2) viruses by concatenating all the eight genome segments.  
269 Tips are colored by genetic group as follows: 3C.2A in red, 3C.2A1b in green, 3C.2A2 in cyan, and  
270 3C.2A3 in blue. To the right is a schematic representation of viral clustering of each gene segment,  
271 which shows consistent lineage classification for all eight segments for all viruses.

272

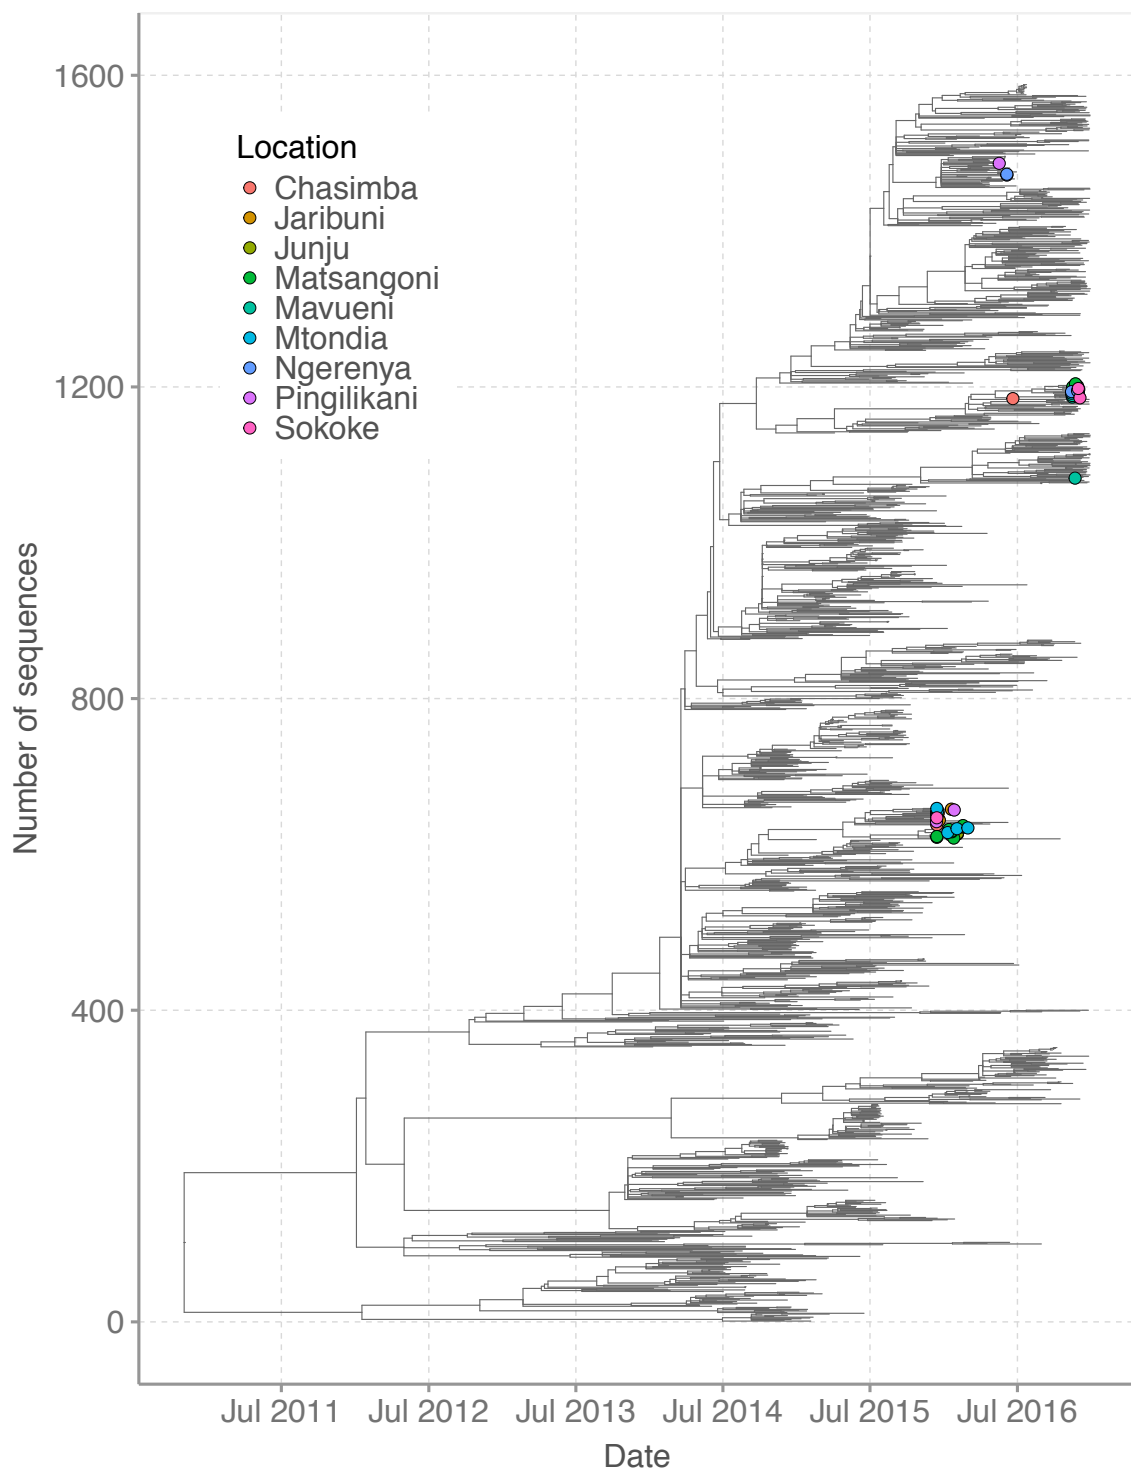

273

274 **Figure 3.** Time-resolved global phylogeny that combined 58 A(H3N2) virus sequences from Kilifi and  
275 1,571 global reference sequences. The Kilifi sequences are indicated with filled circles colored by health  
276 facility.

277

278

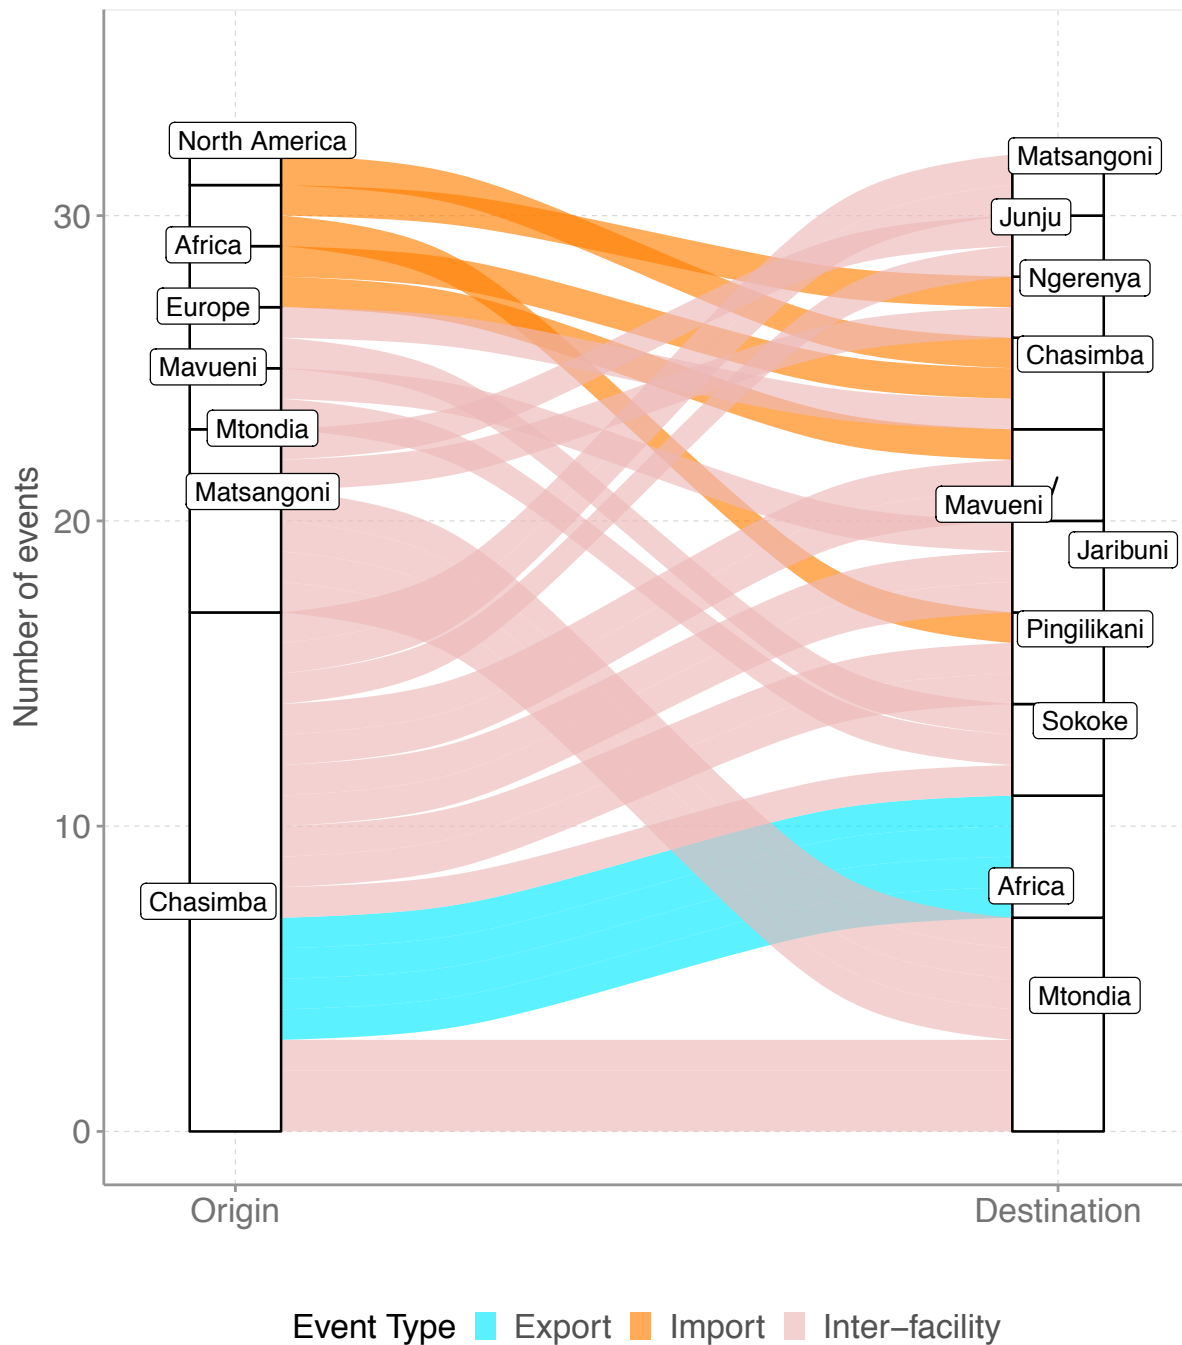

279

280 **Figure 4.** The number of viral imports and exports from Kilifi shown as alluvium plot.

281

### 282 *Phylogeographic structure of A(H3N2) virus in coastal Kenya*

283 To determine the phylogeographic structure in the Kilifi sequence data using a statistical  
284 approach, phylogeny-trait association tests were conducted to determine phylogenetic  
285 association with sampling location (health facility), **Table 2**. For strains from Kilifi, the results

286 confirmed a stronger spatial clustering of sequences at all locations ( $p < 0.001$ ), which is also  
 287 evident in the time-resolved tree of Kilifi sequences, **Figure 5**. Additionally, the maximum  
 288 clade statistic was significant ( $p \leq 0.05$ ) in most locations (6 out of 9 locations) reflecting  
 289 predominantly local evolution in most locations. The estimated differences in observed and  
 290 expected maximum clade values tentatively suggested that Pingilikani and Sokoke exhibited  
 291 the least spatial structure (i.e., most mixing; difference  $< 0$ ) while Matsangoni exhibited the  
 292 strongest spatial structure (difference of 4).

293

294 **Table 2.** Bayesian Tip-association Significance (BaTS) testing results.

295

| Location | Association index (95% CI) ‡ |                  |          | Parsimony scores (95% CI) ‡ |                     |          |
|----------|------------------------------|------------------|----------|-----------------------------|---------------------|----------|
|          | Observed                     | Expected         | p values | Observed                    | Expected            | p values |
| All      | 2.04 (1.77-2.32)             | 5.78 (5.07-6.45) | <0.001   | 25.65 (25-26)               | 37.59 (34.99-39.95) | <0.001   |

296

| Location    | Mean maximum clade size (95% CI) ‡ |                  |          |              |
|-------------|------------------------------------|------------------|----------|--------------|
|             | Observed                           | Expected         | p values | Difference # |
| Chasimba    | 2.00 (2.00-2.00)                   | 1.21 (1.00-1.99) | 0.029    | 0.79         |
| Jaribuni    | 1.99 (2.00-2.00)                   | 1.06 (1.00-1.97) | 0.004    | 0.93         |
| Junju       | 3.99 (4.00-4.00)                   | 1.13 (1.00-1.99) | 0.009    | 2.86         |
| Matsangoni  | 6.05 (6.00-7.00)                   | 2.07 (1.01-3.05) | 0.002    | 3.98         |
| Mavueni     | 2.17 (2.00-3.00)                   | 1.10 (1.00-1.99) | 0.012    | 1.07         |
| Mtondia     | 1.99 (2.00-2.00)                   | 1.46 (1.00-2.23) | 0.111    | 0.53         |
| Ngerenya    | 1.99 (2.00-2.00)                   | 1.08 (1.00-1.99) | 0.005    | 0.91         |
| Pingilikani | 1.00 (1.00-1.00)                   | 1.04 (1.00-1.01) | >0.999   | -0.04        |
| Sokoke      | 1.00 (1.00-1.00)                   | 1.04 (1.00-1.15) | >0.999   | -0.04        |

297

298 ‡95% confidence interval (CI).

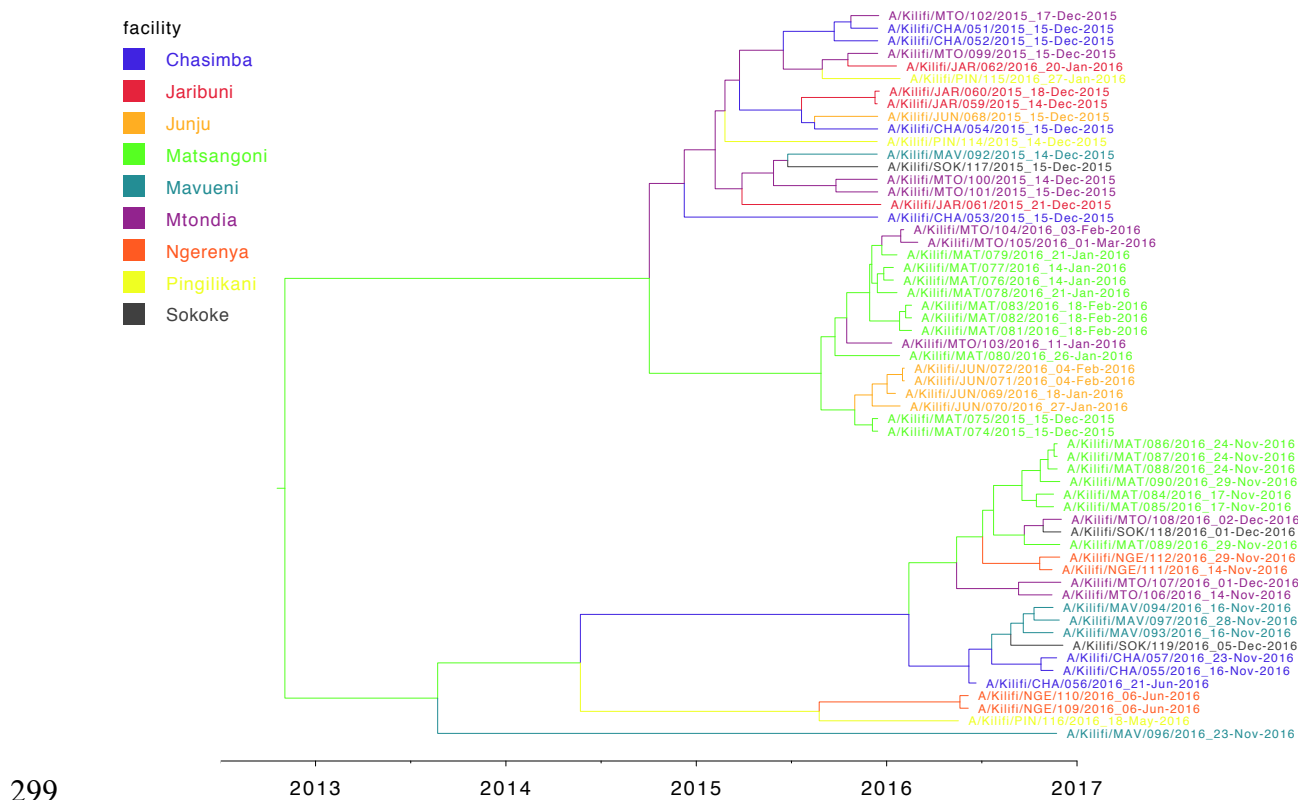

**Figure 5.** Time-resolved MCC tree inferred for A(H3N2) virus sequences from Kilifi, coastal Kenya. Branches are coloured according to the most probable location state, which is indicated in the coloured key at the top left. MCC, maximum clade credibility.

## DISCUSSION

We observed at least five independent introductions of A(H3N2) viruses into the region during the one-year period, with the importations originating from Africa, Europe, and North America. Additionally, we inferred 23 virus location transition events between the nine facilities included in the study. International virus imports into the study area were captured at the facilities of Chasimba, Matsangoni, Mtondia, and Mavueni, while all four exports from the region were captured from the Chasimba facility, all occurring to Africa destinations. We also observed a strong spatial clustering of virus strains at all locations, which was associated with local evolution.

On a global scale, annual influenza A(H3N2) virus epidemics are proposed to result from the introduction of new genetic variants from East or Southeast Asia, where viruses circulate through a network of temporally overlapping epidemics [14, 19] or from temporally migrating metapopulations of influenza viruses that seed global epidemics [18]. Here, we show that the

318 spread of influenza A(H3N2) virus in a local community in coastal Kenya was characterized  
319 by a few virus introductions over a one-year period, followed by frequent inter-facility  
320 populations transmission. We have previously reported up to 29 IBV introductions in this  
321 population in an epidemic year predominated by IBV in 2016 [6]. This reveals that repeated  
322 introductions of A(H3N2) virus and IBV into the local population drove the influenza season  
323 in 2015-16. However, unlike the IBV epidemic, only a few introductions of A(H3N2) virus  
324 instigated the 2015-16 season, which was then sustained through local spread and evolution of  
325 circulating viruses. Therefore, the seasonal dynamics of influenza are far more complex. Wider  
326 and deeper sampling of viruses from understudied tropical and sub-tropical regions is required  
327 for a more complete understanding of the local, regional, and global spread of influenza viruses  
328 [27, 41].

329

330 The genetic diversity of A(H3N2) virus in specific regions arising from multiple virus  
331 importations and subsequent local evolution, as shown in our study, could lead to  
332 predominance of circulating viruses that are not closely matched to previously selected vaccine  
333 strains. In countries like Kenya, where virus circulation is year-round [42], there also exists  
334 unpredictability of which genetic strain may predominate and when. Influenza vaccines with  
335 broad coverage (“universal” vaccines) could be key to managing the disease burden in such  
336 settings. Currently, Kenya does not have a national influenza vaccination policy [43], but it  
337 would be important to consider deployment of quadrivalent influenza vaccines with  
338 representative A(H3N2) virus, A(H1N1)pdm09 virus, and both IBV lineages (B/Victoria and  
339 B/Yamagata) for optimal vaccine effectiveness. It will also be important to investigate further  
340 whether the use of southern hemisphere or northern hemisphere formulated vaccines could  
341 have a place in tropical regions like in Kenya, where virus importations from both hemispheres  
342 are common.

343

344 Inclusion of regional and global sequences deposited in GISAID significantly improved the  
345 power of our phylogenomic analyses, which showed that the Kilifi diversity was part of the  
346 global continuum. For example, we showed extensive geographical mixing of local strains with  
347 global strains from Europe and North America. The use of NGS technology to generate virus  
348 sequence data from Kilifi enables further scrutiny of the available data to answer other key  
349 molecular epidemiological questions. For example, the sequencing depth achieved with NGS



350 may allow for further analysis of minority variant populations. These might be evolving locally  
351 in coastal Kenya region thus undermining the assumption that vaccines matched to globally  
352 dominant strains in trivalent/quadrivalent vaccines may necessarily protect against these local  
353 strains in a local population. Additionally, we have demonstrated the utility of NGS data  
354 analysis to investigate reassortment events in influenza viruses.

355

356 The study had some limitations. First, the study utilized samples collected from outpatients  
357 only, but would have benefitted from additional analysis of samples collected from hospitalized  
358 patients to investigate the patterns of spread of A(H3N2) virus in Kilifi. Second, the prioritized  
359 samples were selected based on anticipated probability of successful sequencing inferred from  
360 the sample's viral load as indicated by the diagnosis Ct value. This strategy ultimately avoided  
361 NGS of some samples that may have been critical in reconstructing the patterns of spread and  
362 transmission clusters of A(H3N2) virus in coastal Kenya. Third, the KHDSS outpatient  
363 facilities surveillance collected a maximum of fifteen samples per week per site. This paucity  
364 of sequence data from some locations may have introduced bias in inference of the  
365 phylogeographic structure of A(H3N2) virus in coastal Kenya.

366

367 In conclusion, although there is paucity of studies that describe the patterns of spread of  
368 influenza on a local scale (city or town), our findings suggest that considerable influenza virus  
369 diversity circulates within defined sub-populations residing in the same geography within a  
370 country, including virus lineages that are unique to those locales, as reported for Kilifi. These  
371 lineages may be capable of dissemination to other populations through virus location transition  
372 events. Further knowledge of the viral lineages that circulate in specific locales is required to  
373 understand the main drivers of novel cases of respiratory diseases and to inform vaccination  
374 strategies within these populations.

375

376 **SUPPORTING INFORMATION**

377 **CONFLICT OF INTEREST:** None.

378

379 **DISCLOSURE:** The findings and conclusions in this manuscript are those of the authors and  
380 do not necessarily represent the official position of the Centers for Disease Control and  
381 Prevention.

382

383 **FUNDING:** The authors D.C.O., F.M.N. and C.N.A. were supported by the Initiative to  
384 Develop African Research Leaders (IDeAL) through the DELTAS Africa Initiative [DEL-15-  
385 003]. The DELTAS Africa Initiative is an independent funding scheme of the African  
386 Academy of Sciences (AAS)'s Alliance for Accelerating Excellence in Science in Africa  
387 (AESA) and supported by the New Partnership for Africa's Development Planning and  
388 Coordinating Agency (NEPAD Agency) with funding from the Wellcome Trust  
389 [107769/Z/10/Z] and the UK government. The study was also part funded by a Wellcome Trust  
390 grant [1029745] and the USA CDC grant [GH002133]. This paper is published with the  
391 permission of the Director of KEMRI.

392

## 393 REFERENCES

- 394 1. World Health Organization. *FluNet Summary*. 2021 [cited 2021 20 August]; Available  
395 from: <https://www.who.int/tools/flunet/flunet-summary>.
- 396 2. Katz, M.A., et al., *Results From the First Six Years of National Sentinel Surveillance for*  
397 *Influenza in Kenya, July 2007–June 2013*. PLoS ONE, 2014. **9**(6): p. e98615.
- 398 3. Emukule, G.O., et al., *The burden of influenza and RSV among inpatients and*  
399 *outpatients in rural western Kenya, 2009-2012*. PLoS One, 2014. **9**(8): p. e105543.
- 400 4. Emukule, G.O., et al., *The Epidemiology and Burden of Influenza B/Victoria and*  
401 *B/Yamagata Lineages in Kenya, 2012-2016*. Open Forum Infect Dis, 2019. **6**(10): p.  
402 ofz421.
- 403 5. Owuor, D.C., et al., *Genetic characterization of influenza A(H3N2) viruses circulating in*  
404 *coastal Kenya, 2009-2017*. Influenza and Other Respiratory Viruses, 2020. **14**(3): p.  
405 320-330.
- 406 6. Nyasimi, F.M., et al., *Epidemiological and evolutionary dynamics of influenza B virus in*  
407 *coastal Kenya as revealed by genomic analysis of strains sampled over a single season*.  
408 *Virus Evolution*, 2020.
- 409 7. Hayden, F. and P. Palese, *Influenza Virus*, in Richman D, Whitley R, Hayden F (ed),  
410 *Clinical Virology*. 2017, ASM Press Washington, DC. p. 1009-1058.
- 411 8. Westgeest, K.B., et al., *Genomewide Analysis of Reassortment and Evolution of Human*  
412 *Influenza A(H3N2) Viruses Circulating between 1968 and 2011*. Journal of Virology,  
413 2014. **88**(5): p. 2844-2857.
- 414 9. Bedford, T., et al., *Integrating influenza antigenic dynamics with molecular evolution*.  
415 *eLife*, 2014. **3**(e01914).
- 416 10. Skehel, J.J. and D.C. Wiley, *Receptor Binding and Membrane Fusion in Virus Entry: The*  
417 *Influenza Hemagglutinin*. Annual Review of Biochemistry, 2000. **69**(1): p. 531-569.
- 418 11. Tewawong, N., et al., *Assessing Antigenic Drift of Seasonal Influenza A(H3N2) and*  
419 *A(H1N1)pdm09 Viruses*. PLoS One, 2015. **10**(10): p. e0139958.
- 420 12. Belongia, E.A., et al., *Variable influenza vaccine effectiveness by subtype: a systematic*  
421 *review and meta-analysis of test-negative design studies*. The Lancet Infectious  
422 Diseases, 2016. **16**: p. 942-951.
- 423 13. ECDC. *Influenza Virus Characterisation Reports, summary Europe*. 2021; Available  
424 from: [https://www.ecdc.europa.eu/en/seasonal-influenza/surveillance-and-disease-](https://www.ecdc.europa.eu/en/seasonal-influenza/surveillance-and-disease-data/influenza-virus-characterisation)  
425 [data/influenza-virus-characterisation](https://www.ecdc.europa.eu/en/seasonal-influenza/surveillance-and-disease-data/influenza-virus-characterisation).
- 426 14. Bedford, T., et al., *Global migration dynamics underlie evolution and persistence of*  
427 *human influenza A (H3N2)*. PLoS Pathog, 2010. **6**(5): p. e1000918.
- 428 15. Bedford, T., et al., *Global circulation patterns of seasonal influenza viruses vary with*  
429 *antigenic drift*. Nature, 2015. **523**(7559): p. 217-20.
- 430 16. Lemey, P., M. Suchard, and A. Rambaut, *Reconstructing the initial global spread of a*  
431 *human influenza pandemic: a Bayesian spatial-temporal model for the global spread*  
432 *of H1N1pdm*. PLoS Curr Biol, 2009. **1**(RRN1031).
- 433 17. Lemey, P., et al., *Unifying viral genetics and human transportation data to predict the*  
434 *global transmission dynamics of human influenza H3N2*. PLoS Pathog, 2014. **10**(2): p.  
435 e1003932.
- 436 18. Bahl, J., et al., *Temporally structured metapopulation dynamics and persistence of*  
437 *influenza A H3N2 virus in humans*. Proc Natl Acad Sci U S A, 2011. **108**(48): p. 19359-  
438 64.

- 439 19. Kosakovsky Pond, S.L., et al., *Network Analysis of Global Influenza Spread*. PLoS  
440 Computational Biology, 2010. **6**(11).
- 441 20. Russell, C.A., et al., *The global circulation of seasonal influenza A (H3N2) viruses*.  
442 Science (New York, N.Y.), 2008. **320**(5874): p. 340-346.
- 443 21. Müller, N.F., et al., *Characterising the epidemic spread of influenza A/H3N2 within a*  
444 *city through phylogenetics*. PLOS Pathogens, 2020. **16**(11): p. e1008984.
- 445 22. McCrone, J.T., et al., *Stochastic processes constrain the within and between host*  
446 *evolution of influenza virus*. Elife, 2018. **7**.
- 447 23. Holmes, E.C., et al., *Extensive geographical mixing of 2009 human H1N1 influenza A*  
448 *virus in a single university community*. J Virol, 2011. **85**(14): p. 6923-9.
- 449 24. Baillie, G.J., et al., *Evolutionary dynamics of local pandemic H1N1/2009 influenza virus*  
450 *lineages revealed by whole-genome analysis*. J Virol, 2012. **86**(1): p. 11-8.
- 451 25. Owuor, D.C., et al., *Characterizing the countrywide epidemic spread of influenza*  
452 *A(H1N1)pdm09 virus in Kenya between 2009 and 2018*. MedRxiv, 2021.
- 453 26. Pollett, S., et al., *Phylogeography of Influenza A(H3N2) Virus in Peru, 2010-2012*.  
454 Emerg Infect Dis, 2015. **21**(8): p. 1330-8.
- 455 27. Ng, S. and A. Gordon, *Influenza Burden and Transmission in the Tropics*. Current  
456 Epidemiology Reports, 2015. **2**(2): p. 89-100.
- 457 28. Scott, J.A., et al., *Profile: The Kilifi Health and Demographic Surveillance System*  
458 *(KHDSS)*. Int J Epidemiol, 2012. **41**(3): p. 650-7.
- 459 29. Nyiro, J.U., et al., *Surveillance of respiratory viruses in the outpatient setting in rural*  
460 *coastal Kenya: baseline epidemiological observations [version 1; referees: 2 approved]*  
461 Wellcome Open Research, 2018. **3**(89).
- 462 30. Hammitt, L.L., et al., *Added Value of an Oropharyngeal Swab in Detection of Viruses in*  
463 *Children Hospitalized with Lower Respiratory Tract Infection* Journal of Clinical  
464 Microbiology, 2011. **49**(6): p. 2318-2320.
- 465 31. Zhou, B. and D.E. Wentworth, *Influenza A virus molecular virology techniques*.  
466 Methods Mol Biol, 2012. **865**: p. 175-92.
- 467 32. Shepard, S.S., et al., *Viral deep sequencing needs an adaptive approach: IRMA, the*  
468 *iterative refinement meta-assembler*. BMC Genomics, 2016. **17**: p. 708.
- 469 33. Li, P.E., et al., *Enabling the democratization of the genomics revolution with a fully*  
470 *integrated web-based bioinformatics platform*. Nucleic Acids Res, 2017. **45**(1): p. 67-  
471 80.
- 472 34. Larsson, A., *AliView: a fast and lightweight alignment viewer and editor for large*  
473 *datasets*. Bioinformatics, 2014. **30**(22): p. 3276-3278.
- 474 35. Vaidya, G., D.J. Lohman, and R. Meier, *SequenceMatrix: concatenation software for*  
475 *the fast assembly of multi-gene datasets with character set and codon information*.  
476 Cladistics, 2011. **27**: p. 171-180.
- 477 36. Han, A.X., et al., *Phylogenetic Clustering by Linear Integer Programming (PhyCLIP)*. Mol  
478 Biol Evol, 2019. **36**(7): p. 1580-1595.
- 479 37. Yu, G., et al., *ggtree: an r package for visualization and annotation of phylogenetic*  
480 *trees with their covariates and other associated data*. Methods in Ecology and  
481 Evolution, 2017. **8**(1): p. 28-36.
- 482 38. Nagarajan, N. and C. Kingsford, *GiRaF: robust, computational identification of*  
483 *influenza reassortments via graph mining*. Nucleic Acids Research, 2011. **39**(6): p. e34-  
484 e34.

- 485 39. Sagulenko, P., V. Puller, and R.A. Neher, *TreeTime: Maximum-likelihood phylodynamic*  
486 *analysis*. *Virus Evol*, 2018. **4**(1): p. vex042.
- 487 40. Parker, J., A. Rambaut, and O.G. Pybus, *Correlating viral phenotypes with phylogeny:*  
488 *Accounting for phylogenetic uncertainty*. *Infection, Genetics and Evolution*, 2008. **8**(3):  
489 p. 239-246.
- 490 41. Viboud, C., et al., *Contrasting the epidemiological and evolutionary dynamics of*  
491 *influenza spatial transmission*. *Philos Trans R Soc Lond B Biol Sci*, 2013. **368**(1614): p.  
492 20120199.
- 493 42. Emukule, G.O., et al., *Influenza activity in Kenya, 2007-2013: timing, association with*  
494 *climatic factors, and implications for vaccination campaigns*. *Influenza and other*  
495 *respiratory viruses*, 2016. **10**(5): p. 375-385.
- 496 43. Dawa, J., et al., *Developing a seasonal influenza vaccine recommendation in Kenya:*  
497 *Process and challenges faced by the National Immunization Technical Advisory Group*  
498 *(NITAG)*. *Vaccine*, 2019. **37**(3): p. 464-472.  
499
